1 **vRNA-vRNA interactions in influenza A virus HA vRNA**

2 **packaging**

3

4 Sho Miyamoto<sup>1,2</sup>, Yukiko Muramoto<sup>1</sup>, Keiko Shindo<sup>1,3</sup>, Yoko Fujita<sup>1,4</sup>,

5 Takeshi Morikawa<sup>1,4</sup>, Ryoma Tamura<sup>1,4</sup>, Jamie L Gilmore<sup>1</sup>, Masahiro

6 Nakano<sup>1,4</sup>, Takeshi Noda<sup>1,4\*</sup>

7

8 <sup>1</sup> Laboratory of Ultrastructural Virology, Institute for Frontier Life and

9 Medical Sciences, Kyoto University, Kyoto, Japan

10 <sup>2</sup> Department of Molecular Virology, Graduate School of Medicine, Kyoto

11 University, Kyoto, Japan

12 <sup>3</sup> Keihanshin Consortium for Fostering the Next Generation of Global

13 Leaders in Research, Kyoto, Japan

14 <sup>4</sup> Laboratory of Ultrastructural Virology, Graduate School of Biostudies,

15 Kyoto University, Kyoto, Japan

16

17 \* Corresponding author

18 E-mail: [t-noda@infront.kyoto-u.ac.jp](mailto:t-noda@infront.kyoto-u.ac.jp) (TN)

19

## 20 **Abstract**

21 The genome of the influenza A virus is composed of eight single-stranded  
22 negative-sense RNA segments (vRNAs). The eight different vRNAs are  
23 selectively packaged into progeny virions. This process likely involves  
24 specific interactions among vRNAs via segment-specific packaging signals  
25 located in the 3' and 5' terminal coding regions of vRNAs. To identify  
26 vRNA(s) that interact with hemagglutinin (HA) vRNA during genome  
27 packaging, we generated a mutant virus, HA 5m2, which possessed five  
28 silent mutations in the 5' packaging signal region of HA vRNA. The HA 5m2  
29 virus had a specific defect in HA vRNA incorporation, which reduced the  
30 viral replication efficiency. After serial passaging in cells, the virus acquired  
31 additional mutations in the 5' terminal packaging signal regions of both HA  
32 and PB2 vRNAs. These mutations contributed to recovery of viral growth  
33 and packaging efficiency of HA vRNA. A direct RNA-RNA interaction  
34 between the 5' ends of HA and PB2 vRNAs was confirmed *in vitro*. Our  
35 results indicate that direct interactions of HA vRNA with PB2 vRNA via their  
36 packaging signal regions are important for selective genome packaging and

- 37 enhance our knowledge on the emergence of pandemic influenza viruses
- 38 through genetic reassortment.

## 39 **Introduction**

40           The genome of the influenza A virus consists of eight segmented,  
41 single-stranded, negative-sense viral RNAs (vRNAs). Each vRNA contains  
42 a central coding region in an antisense orientation. This region is flanked  
43 by segment-specific noncoding regions and common terminal promoter  
44 sequences. Each vRNA forms a helical, rod-shaped ribonucleoprotein  
45 complex (vRNP) that associates with multiple nucleoproteins (NPs) and with  
46 a heterotrimeric RNA-dependent RNA polymerase complex composed of  
47 PB2, PB1, and PA proteins. The vRNP is responsible for transcription and  
48 replication of constituent vRNA. Recent studies examining NP-vRNA  
49 interactions in the context of vRNPs have shown that the NPs bind to vRNA  
50 nucleotides non-uniformly without sequence specificity[1, 2], suggesting  
51 that some parts of the vRNAs are free of NPs, and can potentially form  
52 secondary or tertiary structures that protrude from the surface of rod-  
53 shaped vRNPs.

54           There is evidence to suggest that progeny virions selectively  
55 package each copy of the eight vRNAs. In virions, the eight different vRNPs

56 are arranged in a specific '1+7' pattern, where one vRNP is surrounded by  
57 the other seven vRNPs[3, 4]. The mechanism by which each copy of the  
58 eight vRNAs is selected from a large pool of vRNAs and non-viral RNAs in  
59 virus-infected cells, and how these vRNAs are organized into the specific  
60 '1+7' arrangement, remains unclear. The segment-specific packaging signal  
61 sequences, located in the noncoding and terminal coding regions of both  
62 the 3' and 5' ends of each vRNA, likely ensure the integrity of genome  
63 packaging[5-10]. The terminal coding regions within these packaging signal  
64 sequences are thought to be involved in co-packaging of multiple vRNAs,  
65 and are referred to as bundling signals [11]. Mutations or deletions in  
66 bundling signal sequences reduce the packaging efficiency of several  
67 vRNAs. The impact of such mutations or deletions on packaging efficiency  
68 is hierarchical among the eight vRNAs[8, 12-19], suggesting that there are  
69 specific interactions among the vRNPs. The vRNPs form sub-bundles *en*  
70 *route* to the plasma membrane [20, 21], and vRNPs in virions are directly  
71 or indirectly interconnected with each other[22, 23]; these findings offer  
72 additional evidence for the existence of vRNA-vRNA interactions.

73           To further examine the likely involvement of vRNA-vRNA  
74 interactions in genome packaging, it is necessary to identify which vRNA  
75 segments interact with one another, and which regions of each vRNA  
76 segment participate in these interactions. The potential *in-vitro* interactions  
77 of various naked vRNA segments have previously been described in human  
78 H3N2 and avian H5N2 viruses [22, 24]. However, the various combinations  
79 of vRNA-vRNA interactions differ between the two viruses. It also remains  
80 unclear whether such *in-vitro* vRNA-vRNA interactions in the absence of  
81 NPs reflect interactions that may occur among vRNPs *in vivo*. Only some  
82 nucleotides that are important for vRNA-vRNA interactions have been  
83 identified in the context of virus replication in cells and co-packaging into  
84 virions[22, 25]. These studies suggest that the 5' ends of M vRNA and the  
85 central coding region of PB1 vRNA are involved in interactions and co-  
86 packaging with NA vRNA, respectively. In addition, interactions between  
87 PB1 and NS vRNAs may also be necessary for efficient viral replication and  
88 genome packaging. However, the region in NS vRNA identified to interact  
89 with PB1 vRNA is not located in the region of the previously reported

90 genome packaging signal [26]. Thus, the role of vRNA-vRNA interactions in  
91 genome packaging remains unclear.

92           In this study, we used serial passaging to identify which vRNA(s)  
93 interact with the hemagglutinin (HA) vRNA packaging signal in selective  
94 genome packaging. We first generated a mutant influenza virus (A/WSN/33)  
95 that possesses five silent mutations in the packaging signal of HA vRNA,  
96 which causes a specific defect in the incorporation of HA vRNA. Then, we  
97 serially passaged the mutant virus in cultured cells to restore efficient  
98 incorporation of HA vRNA, and identified mutations that had been newly  
99 introduced into the vRNAs. In addition, we examined the interactions of HA  
100 vRNA with potential partner vRNAs *in vitro*, and assessed the importance  
101 of these vRNA-vRNA interactions in the packaging signal regions specific  
102 for HA vRNA incorporation and viral replication.  
103



## 104 **Results**

### 105 **Generation of mutant viruses possessing silent mutations in the** 106 **packaging signal of HA vRNA.**

107           We first disrupted the packaging signal sequence of HA vRNA which  
108 potentially interacts with other vRNAs during selective genome packaging.

109 For this, we used reverse genetics to generate a series of mutant viruses  
110 that possessed five silent mutations in either the 3' or 5' packaging signal  
111 region of HA vRNA without any amino acid mutations (Fig 1A). The  
112 respective viral titers were examined by plaque assays (Fig 1B). Eight out  
113 of nine mutant viruses replicated at a level similar to that of the wild-type  
114 virus, showing titers of approximately  $3.8 \times 10^8$  PFU/ml; however, an HA 5m2  
115 virus, possessing five silent mutations at nucleotides 1664 to 1676 in HA  
116 vRNA, exhibited an approximately 87% reduced growth rate compared to  
117 the wild-type virus. Sequence analysis confirmed that no unexpected  
118 mutations occurred in any of the eight vRNAs of the HA 5m2 virus. These  
119 results indicate that nucleotides 1664 to 1674 in the packaging signal region  
120 of HA vRNA are necessary for efficient virus growth and are likely involved

121 in HA vRNA packaging, which in agreement with results reported by a  
122 previous study[14].

123

#### 124 **Serial passaging of the HA 5m2 virus in cells**

125 We hypothesized that after several passages, the HA 5m2 virus  
126 would acquire adaptive mutations in vRNAs, which would restore viral  
127 fitness. Accordingly, the HA 5m2 virus was serially passaged in Madin-  
128 Darby Canine Kidney (MDCK) cells, and viral titers were assessed by  
129 plaque assay after each passage. The viruses were designated as HA 5m2  
130 P1, P2, P3, P4, P5, P6, P7, P8, P9, and P10 viruses, according to the  
131 number of passages in MDCK cells. As expected, the growth of the HA 5m2  
132 P10 virus was restored to approximately 61% of that shown by the wild-type  
133 virus (Fig 2A). The titer of the HA 5m2 P10 virus did not increase with an  
134 additional 10 passages (data not shown). Sequencing analysis of all eight  
135 HA 5m2 P10 virus vRNAs revealed that two mutations were newly  
136 introduced into the 5' terminal coding regions of HA vRNA (T1665C) and  
137 PB2 vRNA (G2271T); both of these vRNAs are located within the previously

138 identified genome packaging signaling regions [6, 8, 14, 16].

139           To assess whether these two mutations contributed to the growth of  
140 the HA 5m2 virus, we used reverse genetics to generate recombinant HA  
141 5m2 viruses with additional mutation(s). Recombinant HA 5m2 viruses,  
142 which possessed a single mutation in HA T1665C or PB2 G2271T, both  
143 showed replication that was partially restored to 11 and 24% of the wild-  
144 type virus, respectively (Fig 2B). The recombinant HA 5m2 virus with a  
145 double mutation showed replication that was approximately 65% of the wild-  
146 type virus, similar to the replication levels of the HA 5m2 P10 virus (Fig 2A  
147 and 2B).

148           The HA T1665C and PB2 G2271T mutations lead to amino acid  
149 substitutions HA S545P and PB2 Q748H, respectively. The amino acid 545  
150 is located in the transmembrane region of the HA protein; hence, this  
151 substitution may affect intracellular transport to the plasma membrane and  
152 subsequent incorporation of HA proteins into progeny virions. Therefore, we  
153 examined the amount of HA protein incorporated into progeny virions.  
154 Western blotting showed that the amounts of HA protein were comparable

155 in the HA 5m2 P10, HA 5m2 P1, and wild-type virions. This suggests that  
156 the S545P substitution has little or no effect on the amount of HA protein  
157 incorporated into virions (Fig 2C). To examine the impact of the Q748H  
158 substitution on the polymerase activity of the PB2 protein, we used RT-  
159 qPCR to quantify the amount of vRNA in virus-infected cells at 7 hours post-  
160 infection. The amount of vRNA was similar in HA 5m2 P10-infected, HA 5m2  
161 P1-infected, and wild-type virus-infected cells, suggesting that the Q748H  
162 substitution in PB2 had little or no effect on polymerase activity (Fig 2D).  
163 Taken together, these results suggest that T1665C mutations in HA vRNA  
164 and G2271T mutations in PB2 vRNA participate in the restoration of HA 5m2  
165 viral replication at the RNA level.

166

### 167 **Efficiency of packaging eight vRNAs in HA 5m2 viruses**

168 Because the HA 5m2 virus possessed five silent mutations in the 5'  
169 packaging signal region of HA vRNA, we predicted that it would show  
170 defects in the packaging efficiency of vRNAs (especially of HA vRNA). We  
171 also expected that additional mutations in the 5' packaging signals of HA

172 and PB2 vRNAs would improve the packaging efficiency of HA vRNA. To  
173 assess the packaging efficiency of the HA 5m2 P1 and HA 5m2 P10 viruses,  
174 we extracted vRNA from wild-type, HA 5m2 P1, and HA 5m2 P10 viruses;  
175 then, we quantified the amount of the eight influenza vRNA segments using  
176 RT-qPCR. As expected, the HA 5m2 P1 virus showed a marked defect in  
177 the packaging efficiency of HA vRNA; the packaging efficiency was reduced  
178 to approximately 24% compared with that of the wild-type virus. The HA 5m2  
179 P1 virus also showed small defects in the packaging efficiency of PA, NP,  
180 and NA vRNAs (Fig 3A). Importantly, in the HA 5m2 P10 virus, the packaging  
181 efficiency of HA vRNA was largely recovered to approximately 72% of that  
182 in the wild-type, and those of PA, NP, and NA vRNAs were also partially  
183 recovered (Fig 3A).

184 To further examine the contribution of the PB2 G2271T and HA  
185 T1665C mutations to vRNA packaging efficiency, we used RT-qPCR to  
186 analyze the amount of packaged vRNA in recombinant HA 5m2 viruses  
187 possessing a single mutation or a double mutation. In both recombinant HA  
188 5m2 viruses with either a single PB2 G2271T or HA T1665C mutation, the

189 packaging efficiency of HA vRNA was restored to approximately 33 and 59%  
190 to that of the wild-type virus, respectively (Fig 3B). In the recombinant HA  
191 5m2 virus possessing the double mutation, the packaging efficiency of HA  
192 vRNA was largely restored to approximately 77% of that of the wild-type  
193 virus (Fig 3B); this was consistent with the packaging efficiency of HA vRNA  
194 in the HA 5m2 P10 virus. Taken together, these results show that disruption  
195 of the 5' genome packaging signal in HA vRNA reduces the packaging  
196 efficiency of HA vRNA. Our results also show that additional mutations in  
197 the sequences of 5' genome packaging signals of HA and PB2 vRNAs are  
198 required for efficient HA vRNA packaging. This suggests that functional  
199 interactions occur between HA and PB2 vRNAs via their 5' genome  
200 packaging signals during viral replication.

201

## 202 **Ultrastructural analysis of the HA 5m2 viruses.**

203 To investigate how the RNPs are packaged into the HA 5m2 P1 and  
204 HA 5m2 P10 viruses, we examined ultrathin sections via electron  
205 microscopy (EM). Representative images of transversely and longitudinally

206 sectioned wild-type, HA 5m2 P1, and HA 5m2 P10 virions, budding from the  
207 cell surfaces, are shown in Fig 4A. While some transversely sectioned wild-  
208 type and HA 5m2 P10 virions appeared empty, as reported previously [26],  
209 almost all longitudinally sectioned wild-type and HA 5m2 P10 virions  
210 contained RNPs positioned at the tip of the budding virions. Conversely, the  
211 HA 5m2 P1 viruses often possessed empty particles in both transverse and  
212 longitudinal sections, suggesting that the HA 5m2 virus had defects in the  
213 incorporation of RNPs.

214           To examine the incorporation of RNPs into virions in more detail,  
215 we determined the proportion of empty particles in wild-type, HA 5m2 P1,  
216 and HA 5m2 P10 viruses. For this, virions were purified by  
217 ultracentrifugation through a sucrose cushion and observed by cryo-TEM  
218 (Fig 4B). The particles of the wild-type virus mainly showed uniformly  
219 spherical shapes of approximately 111 nm in diameter; 0.9% (n=1085) of  
220 virions appeared empty or contained only a few vRNPs (Table 1). With a  
221 diameter of approximately 87 nm (n=10,  $p<0.0001$ ), such vRNP packaging-  
222 deficient particles were significantly smaller than intact virions containing

223 multiple RNPs. The proportion of vRNP packaging-deficient particles in the  
 224 HA 5m2 P1 virus was 7.0% (n=1401), significantly higher than those of the  
 225 HA 5m2 P10 (3.2%, n=852,  $p<0.0001$ ) and wild-type (0.9%, n=1085,  
 226  $p<0.0001$ ) viruses. The results of EM analysis support the notion that  
 227 potential interactions between the 5' packaging signals of HA and PB2  
 228 vRNAs are important for appropriate genome packaging.

229

**Table 1. Effect of silent mutations and passages on the packaging of RNPs into progeny virions**

|                                                         | Experiment<br>no. | wt                  | HA 5m2<br>P1        | HA 5m2<br>P10      |
|---------------------------------------------------------|-------------------|---------------------|---------------------|--------------------|
| Proportion of<br>vRNP packaging-<br>deficient particles | 1                 | 3 / 341<br>(0.9%)   | 32 / 505<br>(6.3%)  | 14 / 370<br>(3.7%) |
|                                                         | 2                 | 7 / 744<br>(0.9%)   | 66 / 896<br>(7.4%)  | 13 / 482<br>(2.7%) |
|                                                         | Total             | 10 / 1085<br>(0.9%) | 98 / 1401<br>(7.0%) | 27 / 852<br>(3.2%) |
| $p$ -value*                                             |                   | <0.0001             |                     | <0.0001            |

230 \*Proportions of vRNP packaging-deficient particles in each virus were  
 231 compared with that in the HA 5m2 P1 virus. Data were analyzed using  
 232 Dunnett's test.

233



234 **A direct interaction between HA and PB2 vRNA occurs via the 5' ends**  
235 **of packaging signals *in vitro***

236 We next aimed to confirm that a functional interaction between the  
237 5' terminal regions of HA and PB2 vRNAs is involved in efficient packaging  
238 of HA vRNA. For this, we used a gel shift assay to examine whether direct  
239 RNA-RNA interactions between these two vRNAs occur *in vitro*. To eliminate  
240 possible nonspecific interactions via the non-packaging signal regions of  
241 vRNAs, we synthesized a short HA vRNA comprising the 5' noncoding  
242 region and the 120-nucleotide long coding region, which is designated as  
243 5'HA(120). We also synthesized a short PB2 vRNA comprising the 5'  
244 noncoding region and the 300-nucleotide long coding region, which is  
245 designated as 5'PB2(300) (Fig 5A). In addition to the 5'HA(120) possessing  
246 the wild-type HA vRNA sequence, we synthesized mutant 5'HA(120)  
247 sequences into which we introduced five silent mutations corresponding to  
248 HA 5m1, HA 5m2, HA 5m3, HA 5m4, and HA 5m5 (Fig 1A); these mutant  
249 5'HA(120) vRNAs were designated as 5'HA(120) 5m1, 5'HA(120) 5m2,  
250 5'HA(120) 5m3, 5'HA(120) 5m4, and 5'HA(120) 5m5, respectively. The

251 mixture of wild-type 5'HA(120) and 5'PB2(300) showed slower migration of  
252 the band, indicating formation of a vRNA-vRNA complex (Figs 5B and 5C).  
253 The mutant 5'HA(120) 5m1, 5'HA(120) 5m3, 5'HA(120) 5m4, and 5'HA(120)  
254 5m5 vRNAs also formed a complex with 5'PB2(300), whose proportions  
255 were 69-95% compared to the complex of 5'HA(120) and 5'PB2(300). These  
256 results are consistent with our viral replication data, showing that such  
257 mutations in HA vRNA did not markedly affect viral growth (Fig 1B). In  
258 contrast, the 5'HA(120) 5m2 vRNA associated with 5'PB2(300) to a lesser  
259 degree and did not form a vRNA-vRNA complex efficiently, with only 12%  
260 complex formation compared to the 5'HA(120) and 5'PB2(300), correlating  
261 with the reduced viral growth of the HA 5m2 virus (Fig 1B). Taken together,  
262 these results indicate that there is an interaction between the 5' packaging  
263 signals of HA and PB2 vRNAs in the context of vRNPs, which is important  
264 for optimal packaging of HA vRNA.

265

## 266 **Discussion**

267           Specific interactions among eight different vRNAs are likely  
268 required for selective genome packaging of the influenza viruses. To identify  
269 the interactions of HA vRNA in the context of RNPs, we generated a mutant  
270 HA 5m2 virus with reduced packaging efficiency of HA vRNA, and repeatedly  
271 passaged this virus in cultured cells to restore viral fitness. We found that  
272 the HA 5m2 virus acquired additional mutations in the 5' packaging signal  
273 sequences of HA and PB2 vRNAs; this restored HA vRNA packaging  
274 efficiency and viral growth. Our results suggest that the packaging signal at  
275 the 5' terminal coding region of HA vRNA is involved in co-packaging of the  
276 eight different vRNAs; this likely occurs via a direct RNA-RNA interaction  
277 with the 5' packaging signal of PB2 vRNA. To the best of our knowledge,  
278 this is the first study experimentally showing that a packaging-deficient  
279 virus can recover its packaging efficiency by the introduction of mutations  
280 in other vRNA segments during viral replication.

281           The 5' packaging signal sequence, located at nucleotides 1662 to  
282 1681 in HA vRNA, is more than 90% conserved in H1 subtype influenza

283 viruses. However, the neighboring regions show less sequence  
284 conservation [14], suggesting that this region is important for HA vRNA  
285 packaging at the RNA level. Our results show that introduction of five silent  
286 mutations into the highly conserved region at nucleotides 1664 to 1676 in  
287 HA vRNA reduced the incorporation efficiency of HA vRNA (Fig. 2A). An  
288 additional mutation at nucleotide 1665 restored the reduced efficiency of  
289 HA vRNA packaging (Fig. 2B). This confirms that the highly conserved  
290 region in the sequence of the 5' terminal packaging signal is involved in  
291 incorporation of HA vRNA. Recent findings indicate that NP non-uniformly  
292 decorates vRNA [1, 2]. Therefore, it is possible that the region at  
293 nucleotides 1664 to 1676 in HA vRNA, identified in this study, is NP-free  
294 and forms secondary or tertiary structures on vRNPs to interact with the 5'  
295 packaging signal of PB2 vRNA. However, whether the 5' terminal coding  
296 region of HA vRNA is a low NP-binding region remains unclear [1, 2].  
297 Additional work is necessary to determine the precise location of the NP-  
298 free region of HA vRNA in the A/WSN/33 strain.

299 After the HA 5m2 virus was serially passaged in MDCK cells, the

300 virus acquired a G2271T mutation in the 5' packaging signal sequence of  
301 PB2 vRNA, which recovered the reduced incorporation of HA vRNA (Fig.  
302 2B). This finding suggests that the region around nucleotide 2271 in PB2  
303 vRNA is involved in interactions with HA vRNA. However, a previous study  
304 showed that the introduction of silent mutations at nucleotides 2268 to 2286,  
305 including a mutation at nucleotide 2271, in PB2 vRNA did not reduce the  
306 packaging efficiency of HA vRNA [14]. Therefore, it is possible that the  
307 mutation at G2271T in PB2 vRNA, found in this study, was acquired for the  
308 optimal packaging of HA 5m2 vRNA but not of wild-type HA vRNA.

309         Although the 5' terminal coding region of H1 subtype HA vRNA is  
310 conserved in H1 HA vRNA, it is substantially different from other subtypes  
311 of HA vRNAs at the nucleotide level [13]. In contrast, the 5' terminal coding  
312 region of PB2 vRNA is highly conserved in influenza viruses [13, 17],  
313 suggesting that intersegmental interactions between HA and PB2 vRNAs  
314 via their 5' terminal regions may be specific to the H1 subtype. Native gel  
315 electrophoresis analysis of *in-vitro* vRNA-vRNA interactions revealed that  
316 avian H5N2 and human H3N2 viruses show different intersegmental

317 networks among the eight vRNAs, and do not show strong interactions  
318 between HA and PB2 vRNAs [22, 24]. In the context of vRNPs, *in-vitro*  
319 interactions do not necessarily reflect interactions *in-vivo*. Therefore,  
320 further studies are needed to clarify whether HA vRNAs of other subtypes  
321 require interactions with PB2 vRNA for HA vRNA packaging in the context  
322 of vRNPs.

323         The reduced HA vRNA packaging efficiency of the HA 5m2 virus was  
324 rescued when the virus spontaneously acquired adaptive mutations in HA  
325 and PB2 vRNAs during serial passaging (Fig. 2A and 2B). Previously, Marsh  
326 et al., serially passaged an influenza A virus (WSN strain), which possesses  
327 synonymous mutations in HA vRNAs, to determine whether the virus would  
328 generate adaptive mutations for recovery of the reduced HA vRNA  
329 packaging efficiency. However, the virus did not generate any mutations to  
330 improve viral fitness [14]. This may have been due to the number of  
331 synonymous mutations introduced into the HA vRNAs. Nine nucleotide  
332 mutations were introduced into the region of 1659 to 1673 in the HA vRNAs  
333 in the study by Marsh et al., while only five mutations were introduced into

334 the region of 1664 to 1679 in HA vRNAs in our present study. More  
335 mutations may cause severe incompatibility in vRNA-vRNA interactions.  
336 Even repeated serial passaging may not generate multiple nucleotide  
337 changes in HA vRNA and its respective interacting vRNA to restore the HA  
338 vRNA packaging efficiency.

339           In conclusion, we have shown that an interaction between HA vRNA  
340 and PB2 vRNA via the 5' packaging signals is important for HA vRNA  
341 packaging. Our results suggest that HA vRNA is co-packaged with PB2  
342 vRNA into virions. These findings will help us understand how reassortant  
343 influenza viruses incorporate HA vRNA segments, and how pandemic  
344 viruses emerge via genetic reassortment.  
345

## 346 **Materials and Methods**

### 347 **Cells**

348 Human embryonic kidney (293T) cells were maintained in  
349 Dulbecco's Modified Eagle Medium (D6046, Sigma) supplemented with 10%  
350 fetal bovine serum (FB-1365, Biosera, Chile). Madin-Darby Canine Kidney  
351 (MDCK) cells were grown in Minimal Essential Medium (MEM)(11430-030,  
352 Gibco) containing 5% newborn calf serum (16010-159, Gibco, New Zealand).  
353 Cultures were maintained at 37°C in a 5% CO<sub>2</sub> atmosphere. The medium  
354 used during viral infection of cells was MEM containing 0.3% bovine serum  
355 albumin (BSA/MEM).

356

### 357 **Construction of the Poll HA plasmid**

358 To generate the Poll HA mutant plasmid, we amplified the Poll-HA  
359 plasmid by inverse PCR using a previously published protocol [27]. The  
360 primers used are listed in S1 Table.

361

### 362 **Reverse genetics**



363 Reverse genetics were performed using Poll plasmids that  
364 contained cDNA sequences of the A/WSN/33(H1N1) viral genes; all  
365 procedures were conducted as described previously [28]. Briefly, eight Poll  
366 plasmids and pCAGGS protein-expression plasmids for PB2, PB1, PA, and  
367 NP were mixed with the transfection reagent TransIT-293 (Mirus), and  
368 added to 293T cells cultured in BSA/MEM. At 48 hours post-transfection,  
369 the cells were treated with 1  $\mu$ g /ml of TPCK-Trypsin for 30 min, centrifuged  
370 at 1750  $\times$  g for 15 min at 4°C, and the supernatant was harvested and stored  
371 at -80°C. To generate mutant viruses, the Poll-HA wt plasmid was replaced  
372 with a Poll-HA mutant plasmid. Viral titers were determined by a plaque  
373 assay conducted using MDCK cells.

374

### 375 **Virus purification**

376 After collecting the supernatants from virus-infected MDCK cells,  
377 each supernatant was clarified by centrifugation at 1750  $\times$  g for 15 min at  
378 4°C, followed by another centrifugation at 6700  $\times$  g for 30 min at 4°C. To  
379 eliminate RNAs outside of the virus particles, the supernatants were treated

380 with 5 µg/ml RNase A (Nacalai Tesque) for 1 hour at 37°C. Virions in the  
381 supernatants were purified by ultracentrifugation through a 30% (w/w)  
382 sucrose cushion at 125,000 × g for 2 hours at 4°C. The pellets were then  
383 resuspended in phosphate buffered saline (PBS).

384

### 385 **Western blotting**

386 MDCK cells were infected with the viruses at a multiplicity of  
387 infection (MOI) of 1 on ice for 1 hour. The infected MDCK cells were then  
388 cultured in BSA/MEM containing 1 µg /ml TPCK-Trypsin. At 10 hours post-  
389 infection, the supernatant was harvested and purified as described above.  
390 The purified virus was dissolved with an equal volume of 2x Tris-Glycine  
391 SDS Sample Buffer (Thermo Fisher Scientific) and boiled for 5 min without  
392 a reducing agent, and then subjected to SDS-PAGE. Proteins were  
393 electroblotted onto Immobilon-P transfer membranes (Millipore  
394 Corporation). The membranes were blocked with Blocking One (Nacalai  
395 Tesque) for 30 min at room temperature, and then incubated with goat anti-  
396 influenza A virus polyclonal antibody (ab20841, Abcam, 1:10,000 dilution)

397 overnight at 4°C. After incubation with rabbit anti-goat IgG secondary  
398 antibody (ab6741, Abcam, 1:10,000 dilution) for 1 hour at room temperature,  
399 the blots were developed using a Chemi-Lumi One Super (Nacalai Tesque).

400

#### 401 **RT-qPCR**

402           The packaged vRNAs were extracted from purified viruses using an  
403 RNeasy Mini Kit (Qiagen). 100 ng of extracted vRNAs were reverse  
404 transcribed using a Uni-12 primer (5'-AGCRAAAGCAGG-3') and  
405 Superscript III reverse transcriptase (Invitrogen). Quantification was  
406 performed by qPCR on a Rotor-Gene Q 2plex System (Qiagen) using  
407 segment-specific primers modified from the protocol by Marsh *et al.* The  
408 primers used are listed in S1 Table. For each sample, reactions contained  
409 1 µl 10-fold diluted RT product, 7.5 µl THUNDERBIRD SYBR qPCR Mix  
410 (Toyobo), 0.25 µM segment-specific primers, for a final volume of 15 µl.  
411 Cycling conditions were: 2 min at 94°C, followed by 40 cycles (98°C for 10  
412 s, 55°C for 15 s, and 72°C for 30 s).

413           In Figure 2D, total RNA was extracted from virus-infected cells

414 using an RNeasy Mini Kit (Qiagen). For PB2, PB1, HA, and NP vRNAs, RT-  
415 qPCR was performed as described above, using 100 ng total RNA. The  
416 values were expressed as numbers of RNA copies in an infected cell,  
417 assuming that a cell contained 10 pg of RNA [29, 30].

418

### 419 **Ultrathin section electron microscopy (EM)**

420 Ultrathin section EM was performed as described previously [3].  
421 MDCK cells were infected at MOI=10. At 10 hours post-infection, the  
422 infected cells were prefixed with 2.5% glutaraldehyde in 0.1 M cacodylate  
423 buffer (pH 7.4) on ice. Ultrathin (50-nm-thick) sections were stained with 2%  
424 uranyl acetate in 70% ethanol and in Reynold's lead citrate. Representative  
425 images were acquired using HT7700 (Hitachi).

426

### 427 **Quantification of vRNP packaging-deficient particles**

428 Purified viruses were applied onto C-flat holey carbon grids  
429 (Protichips), which were blotted on a Vitrobot Mark IV (Thermo Fisher  
430 Scientific) before plunge-freezing in liquid ethane. Samples were kept cool

431 in liquid nitrogen. Samples were imaged at 200 kV on a Talos F200C  
432 (Thermo Fisher Scientific) equipped with a Ceta 16M CMOS camera (Gatan).  
433 More than 300 particles were observed for each experiment.

434

### 435 ***In vitro* RNA synthesis**

436 Shortened HA and PB2 vRNAs were synthesized *in vitro* using T7  
437 transcription as described previously [30]. Briefly, templates containing a  
438 T7 phage promoter sequence (5'-TAATACGACTCACTATAGGG-3') were  
439 amplified by PCR using corresponding primer pairs and were purified with  
440 a QIAquick PCR purification kit (Qiagen). The primers used are listed in S1  
441 Table. Purified PCR products were transcribed *in vitro* using the RiboMAX  
442 Large Scale RNA Production System-T7 (Promega) at 37°C for 4 h, followed  
443 by RQ1 DNase I (Promega) digestion of the DNA template at 37°C for 15  
444 min. The transcript was purified with an RNeasy Mini Kit.

445

### 446 **RNA binding assay**

447 RNA-RNA interactions were analyzed by electrophoretic mobility

448 shift assays essentially as described previously [24]. To facilitate RNA  
449 folding, adjustments were made to the reaction buffer employed and  
450 incubation time as described below [31]. Pairs of purified vRNAs (2 pmol of  
451 each vRNA) were denatured for 10 min at 65°C in 5 µl of ultrapure water  
452 and cooled on ice. We then added 5 µl of 2-fold concentrated buffer (final  
453 concentration: 50 mM HEPES, 50 mM KCl, and 20 mM MgCl<sub>2</sub>) and incubated  
454 the samples for 2 hours at 37°C. Then, 2 µl of loading buffer [40% (v/v)  
455 glycerol and 0.05% (w/v) bromophenol blue] was added to the samples, and  
456 the samples were analyzed using 1.0% agarose gels containing 0.01% (w/v)  
457 ethidium bromide. Native gel electrophoresis of the RNA complexes was  
458 performed at 4°C in a buffer containing 50 mM Tris, 44.5 mM borate, and  
459 0.1 mM MgCl<sub>2</sub>. We then determined the RNA weight fraction (%) of each  
460 band in each lane. The percentage of intermolecular complex formation was  
461 determined by dividing the weight fraction of a band by the sum of weight  
462 fractions in the corresponding lane.

463

464 **Statistical analysis**

465           The statistical significance of the viral titers, the proportions of  
466 vRNP packaging-deficient particles and the formation efficiencies of vRNA-  
467 vRNA complexes were calculated using Dunnett's test. Diameters of virus  
468 particles observed by EM were statistically analyzed using Welch's t-test. P  
469 values of  $< 0.01$  were considered significant.  
470

471 **Acknowledgments**

472 We thank Connor Park for editing the manuscript.

473



## 474 **References**

- 475 1. Williams GD, Townsend D, Wylie KM, Kim PJ, Amarasinghe GK,  
476 Kutluay SB, et al. Nucleotide resolution mapping of influenza A virus  
477 nucleoprotein-RNA interactions reveals RNA features required for  
478 replication. *Nature communications*. 2018;9(1):465. Epub 2018/02/02. doi:  
479 10.1038/s41467-018-02886-w. PubMed PMID: 29386621; PubMed Central  
480 PMCID: PMC5792457.
- 481 2. Lee N, Le Sage V, Nanni AV, Snyder DJ, Cooper VS, Lakdawala SS.  
482 Genome-wide analysis of influenza viral RNA and nucleoprotein association.  
483 *Nucleic acids research*. 2017;45(15):8968-77. doi: 10.1093/nar/gkx584.
- 484 3. Noda T, Sagara H, Yen A, Takada A, Kida H, Cheng RH, et al.  
485 Architecture of ribonucleoprotein complexes in influenza A virus particles.  
486 *Nature*. 2006;439(7075):490-2. Epub 2006/01/27. doi:  
487 10.1038/nature04378. PubMed PMID: 16437116.
- 488 4. Chou YY, Vafabakhsh R, Doganay S, Gao Q, Ha T, Palese P. One  
489 influenza virus particle packages eight unique viral RNAs as shown by FISH  
490 analysis. *Proceedings of the National Academy of Sciences of the United*

491 States of America. 2012;109(23):9101-6. Epub 2012/05/02. doi:  
492 10.1073/pnas.1206069109. PubMed PMID: 22547828; PubMed Central  
493 PMCID: PMCPMC3384215.

494 5. Fujii Y, Goto H, Watanabe T, Yoshida T, Kawaoka Y. Selective  
495 incorporation of influenza virus RNA segments into virions. Proceedings of  
496 the National Academy of Sciences of the United States of America.  
497 2003;100(4):2002-7. Epub 2003/02/08. doi: 10.1073/pnas.0437772100.  
498 PubMed PMID: 12574509; PubMed Central PMCID: PMCPMC149948.

499 6. Watanabe T, Watanabe S, Noda T, Fujii Y, Kawaoka Y. Exploitation  
500 of nucleic acid packaging signals to generate a novel influenza virus-based  
501 vector stably expressing two foreign genes. Journal of virology.  
502 2003;77(19):10575-83. Epub 2003/09/13. PubMed PMID: 12970442;  
503 PubMed Central PMCID: PMCPMC228515.

504 7. Fujii K, Fujii Y, Noda T, Muramoto Y, Watanabe T, Takada A, et al.  
505 Importance of both the coding and the segment-specific noncoding regions  
506 of the influenza A virus NS segment for its efficient incorporation into virions.  
507 Journal of virology. 2005;79(6):3766-74. Epub 2005/02/26. doi:

508 10.1128/jvi.79.6.3766-3774.2005. PubMed PMID: 15731270; PubMed

509 Central PMCID: PMCPMC1075679.

510 8. Muramoto Y, Takada A, Fujii K, Noda T, Iwatsuki-Horimoto K,

511 Watanabe S, et al. Hierarchy among viral RNA (vRNA) segments in their

512 role in vRNA incorporation into influenza A virions. *Journal of virology*.

513 2006;80(5):2318-25. Epub 2006/02/14. doi: 10.1128/jvi.80.5.2318-

514 2325.2006. PubMed PMID: 16474138; PubMed Central PMCID:

515 PMCPMC1395381.

516 9. Ozawa M, Fujii K, Muramoto Y, Yamada S, Yamayoshi S, Takada A,

517 et al. Contributions of two nuclear localization signals of influenza A virus

518 nucleoprotein to viral replication. *Journal of virology*. 2007;81(1):30-41.

519 Epub 2006/10/20. doi: 10.1128/jvi.01434-06. PubMed PMID: 17050598;

520 PubMed Central PMCID: PMCPMC1797272.

521 10. Ozawa M, Maeda J, Iwatsuki-Horimoto K, Watanabe S, Goto H,

522 Horimoto T, et al. Nucleotide sequence requirements at the 5' end of the

523 influenza A virus M RNA segment for efficient virus replication. *Journal of*

524 *virology*. 2009;83(7):3384-8. Epub 2009/01/23. doi: 10.1128/jvi.02513-08.

525 PubMed PMID: 19158245; PubMed Central PMCID: PMCPMC2655591.

526 11. Goto H, Muramoto Y, Noda T, Kawaoka Y. The genome-packaging  
527 signal of the influenza A virus genome comprises a genome incorporation  
528 signal and a genome-bundling signal. *Journal of virology*.  
529 2013;87(21):11316-22. Epub 2013/08/09. doi: 10.1128/jvi.01301-13.

530 PubMed PMID: 23926345; PubMed Central PMCID: PMCPMC3807325.

531 12. Liang Y, Hong Y, Parslow TG. cis-Acting packaging signals in the  
532 influenza virus PB1, PB2, and PA genomic RNA segments. *Journal of*  
533 *virology*. 2005;79(16):10348-55. Epub 2005/07/30. doi:  
534 10.1128/jvi.79.16.10348-10355.2005. PubMed PMID: 16051827; PubMed  
535 Central PMCID: PMCPMC1182667.

536 13. Gog JR, Afonso Edos S, Dalton RM, Leclercq I, Tiley L, Elton D, et  
537 al. Codon conservation in the influenza A virus genome defines RNA  
538 packaging signals. *Nucleic acids research*. 2007;35(6):1897-907. Epub  
539 2007/03/03. doi: 10.1093/nar/gkm087. PubMed PMID: 17332012; PubMed  
540 Central PMCID: PMCPMC1874621.

541 14. Marsh GA, Hatami R, Palese P. Specific residues of the influenza A

542 virus hemagglutinin viral RNA are important for efficient packaging into  
543 budding virions. *Journal of virology*. 2007;81(18):9727-36. Epub 2007/07/20.  
544 doi: 10.1128/jvi.01144-07. PubMed PMID: 17634232; PubMed Central  
545 PMCID: PMCPMC2045411.

546 15. Hutchinson EC, Curran MD, Read EK, Gog JR, Digard P. Mutational  
547 analysis of cis-acting RNA signals in segment 7 of influenza A virus. *Journal*  
548 *of virology*. 2008;82(23):11869-79. Epub 2008/09/26. doi:  
549 10.1128/jvi.01634-08. PubMed PMID: 18815307; PubMed Central PMCID:  
550 PMCPMC2583641.

551 16. Liang Y, Huang T, Ly H, Parslow TG, Liang Y. Mutational analyses  
552 of packaging signals in influenza virus PA, PB1, and PB2 genomic RNA  
553 segments. *Journal of virology*. 2008;82(1):229-36. Epub 2007/10/26. doi:  
554 10.1128/jvi.01541-07. PubMed PMID: 17959657; PubMed Central PMCID:  
555 PMCPMC2224372.

556 17. Marsh GA, Rabadan R, Levine AJ, Palese P. Highly conserved  
557 regions of influenza a virus polymerase gene segments are critical for  
558 efficient viral RNA packaging. *Journal of virology*. 2008;82(5):2295-304.

559 Epub 2007/12/21. doi: 10.1128/jvi.02267-07. PubMed PMID: 18094182;

560 PubMed Central PMCID: PMCPMC2258914.

561 18. Hutchinson EC, Wise HM, Kudryavtseva K, Curran MD, Digard P.

562 Characterisation of influenza A viruses with mutations in segment 5

563 packaging signals. *Vaccine*. 2009;27(45):6270-5. Epub 2009/10/21. doi:

564 10.1016/j.vaccine.2009.05.053. PubMed PMID: 19840659; PubMed Central

565 PMCID: PMCPMC2771075.

566 19. Gao Q, Chou YY, Doganay S, Vafabakhsh R, Ha T, Palese P. The

567 influenza A virus PB2, PA, NP, and M segments play a pivotal role during

568 genome packaging. *Journal of virology*. 2012;86(13):7043-51. Epub

569 2012/04/26. doi: 10.1128/jvi.00662-12. PubMed PMID: 22532680; PubMed

570 Central PMCID: PMCPMC3416350.

571 20. Chou YY, Heaton NS, Gao Q, Palese P, Singer RH, Lionnet T.

572 Colocalization of different influenza viral RNA segments in the cytoplasm

573 before viral budding as shown by single-molecule sensitivity FISH analysis.

574 *PLoS pathogens*. 2013;9(5):e1003358. Epub 2013/05/15. doi:

575 10.1371/journal.ppat.1003358. PubMed PMID: 23671419; PubMed Central

576 PMCID: PMCPMC3649991.

577 21. Lakdawala SS, Wu Y, Wawrzusin P, Kabat J, Broadbent AJ,  
578 Lamirande EW, et al. Influenza a virus assembly intermediates fuse in the  
579 cytoplasm. PLoS pathogens. 2014;10(3):e1003971. Epub 2014/03/08. doi:  
580 10.1371/journal.ppat.1003971. PubMed PMID: 24603687; PubMed Central  
581 PMCID: PMCPMC3946384.

582 22. Fournier E, Moules V, Essere B, Paillart JC, Sirbat JD, Isel C, et al.  
583 A supramolecular assembly formed by influenza A virus genomic RNA  
584 segments. Nucleic acids research. 2012;40(5):2197-209. Epub 2011/11/15.  
585 doi: 10.1093/nar/gkr985. PubMed PMID: 22075989; PubMed Central  
586 PMCID: PMCPMC3300030.

587 23. Noda T, Sugita Y, Aoyama K, Hirase A, Kawakami E, Miyazawa A,  
588 et al. Three-dimensional analysis of ribonucleoprotein complexes in  
589 influenza A virus. Nature communications. 2012;3:639. Epub 2012/01/26.  
590 doi: 10.1038/ncomms1647. PubMed PMID: 22273677; PubMed Central  
591 PMCID: PMCPMC3272569.

592 24. Gavazzi C, Isel C, Fournier E, Moules V, Cavalier A, Thomas D, et

593 al. An in vitro network of intermolecular interactions between viral RNA  
594 segments of an avian H5N2 influenza A virus: comparison with a human  
595 H3N2 virus. *Nucleic acids research*. 2013;41(2):1241-54. Epub 2012/12/12.  
596 doi: 10.1093/nar/gks1181. PubMed PMID: 23221636; PubMed Central  
597 PMCID: PMC3553942.

598 25. Gilbertson B, Zheng T, Gerber M, Printz-Schweigert A, Ong C,  
599 Marquet R, et al. Influenza NA and PB1 Gene Segments Interact during the  
600 Formation of Viral Progeny: Localization of the Binding Region within the  
601 PB1 Gene. *Viruses*. 2016;8(8). Epub 2016/08/25. doi: 10.3390/v8080238.  
602 PubMed PMID: 27556479; PubMed Central PMCID: PMC4997600.

603 26. Gavazzi C, Yver M, Isel C, Smyth RP, Rosa-Calatrava M, Lina B, et  
604 al. A functional sequence-specific interaction between influenza A virus  
605 genomic RNA segments. *Proceedings of the National Academy of Sciences*  
606 *of the United States of America*. 2013;110(41):16604-9. Epub 2013/09/27.  
607 doi: 10.1073/pnas.1314419110. PubMed PMID: 24067651; PubMed Central  
608 PMCID: PMC3799358.

609 27. Ochman H, Gerber AS, Hartl DL. Genetic applications of an inverse



- 610 polymerase chain reaction. *Genetics*. 1988;120(3):621-3. Epub 1988/11/01.
- 611 PubMed PMID: 2852134; PubMed Central PMCID: PMC1203539.
- 612 28. Neumann G, Watanabe T, Ito H, Watanabe S, Goto H, Gao P, et al.
- 613 Generation of influenza A viruses entirely from cloned cDNAs. *Proceedings*
- 614 of the National Academy of Sciences of the United States of America.
- 615 1999;96(16):9345-50. Epub 1999/08/04. PubMed PMID: 10430945; PubMed
- 616 Central PMCID: PMC17785.
- 617 29. Hatada E, Hasegawa M, Mukaigawa J, Shimizu K, Fukuda R.
- 618 Control of Influenza Virus Gene Expression: Quantitative Analysis of Each
- 619 Viral RNA Species in Infected Cells. *The Journal of Biochemistry*.
- 620 1989;105(4):537-46.
- 621 30. Kawakami E, Watanabe T, Fujii K, Goto H, Watanabe S, Noda T, et
- 622 al. Strand-specific real-time RT-PCR for distinguishing influenza vRNA,
- 623 cRNA, and mRNA. *Journal of virological methods*. 2011;173(1):1-6. Epub
- 624 2010/12/28. doi: 10.1016/j.jviromet.2010.12.014. PubMed PMID: 21185869;
- 625 PubMed Central PMCID: PMC1203539.
- 626 31. Buchmueller KL, Weeks KM. Tris-borate is a poor counterion for

627 RNA: a cautionary tale for RNA folding studies. *Nucleic acids research*.

628 2004;32(22):e184. Epub 2004/12/17. doi: 10.1093/nar/gnh182. PubMed

629 PMID: 15601995; PubMed Central PMCID: PMC545480.

630

A.

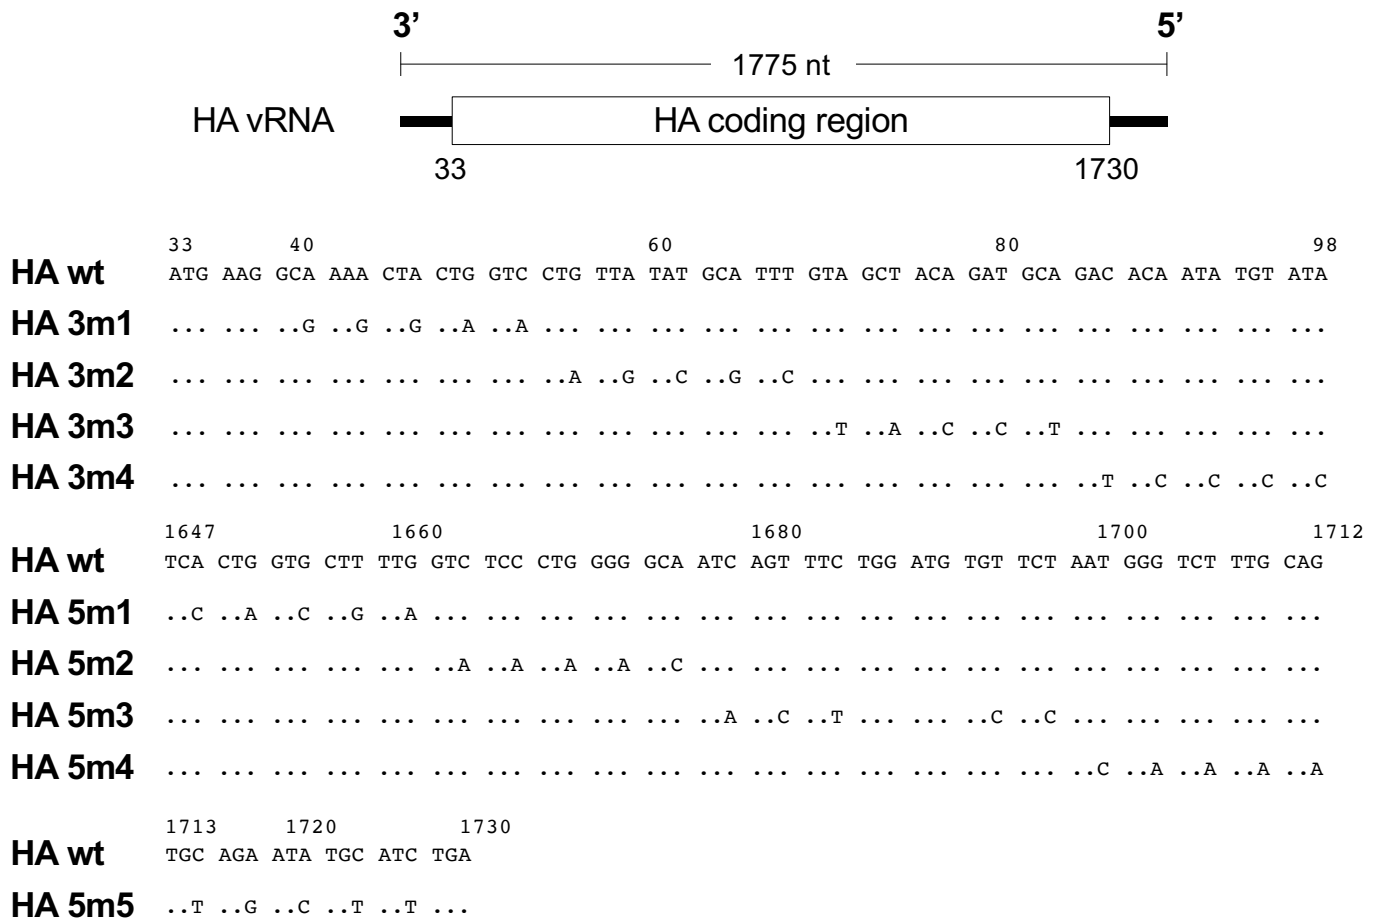

B.

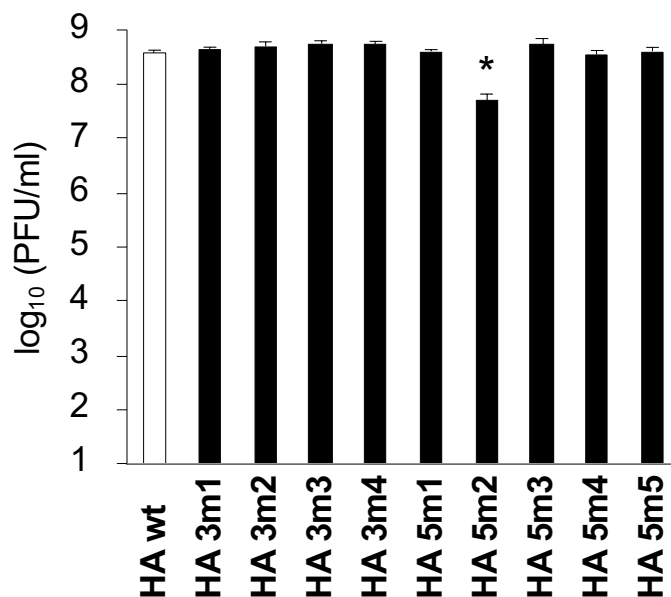

**Fig 1. Generation of mutant influenza A viruses by reverse genetics and replication efficiencies of these mutant viruses.** (A) Schematic diagram of mutant HA vRNAs with silent mutations introduced into the packaging signal sequences. The 3' and 5' ends of the HA coding region (nucleotides 33–98 and 1649–1730, respectively) are shown in the mRNA-sense orientation. (B) 293T cells were transfected with plasmids to produce the mutant and wild-type viruses. MDCK cells were infected with these mutant and wild-type viruses at a multiplicity of infection (MOI) of  $10^{-5}$ . Virus yields at 48 h post-infection were determined by a plaque assay on MDCK cells. The data represent the mean  $\pm$  SD ( $n = 3$ ). Dunnett's test; \* $P < 0.01$

A.

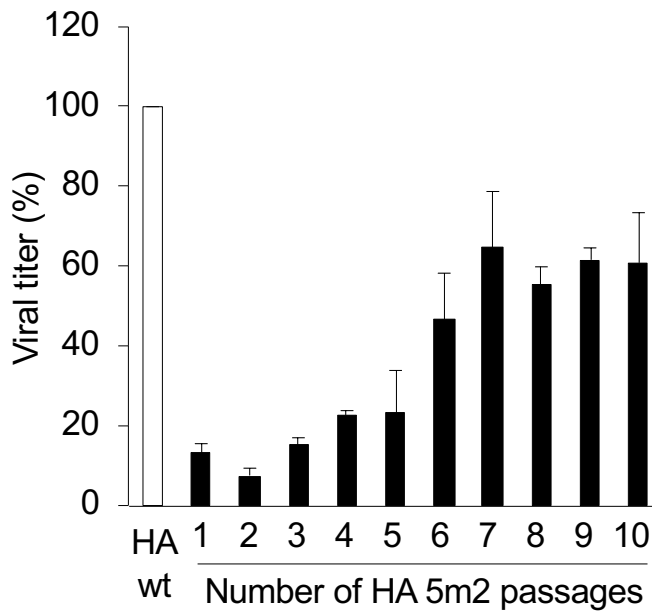

B.

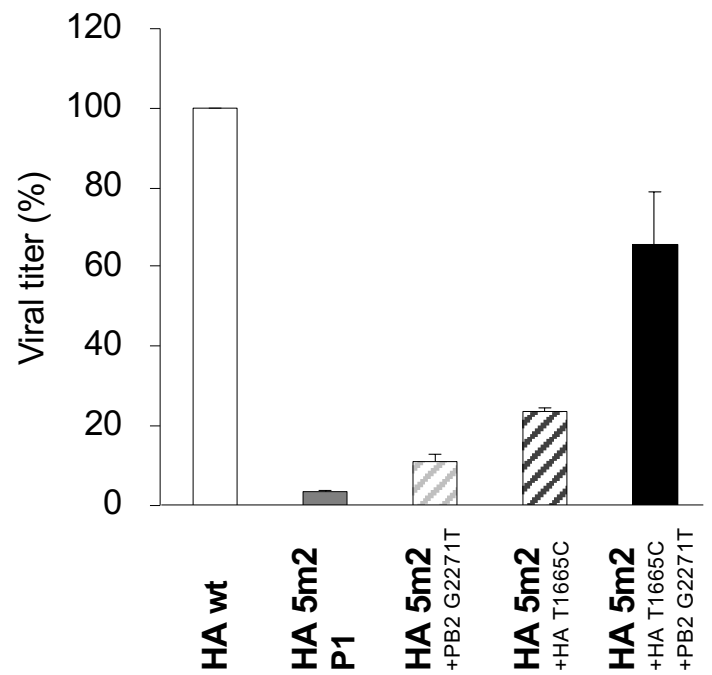

C.

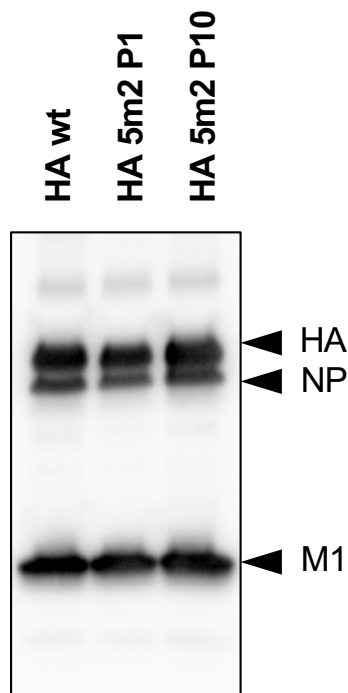

D.

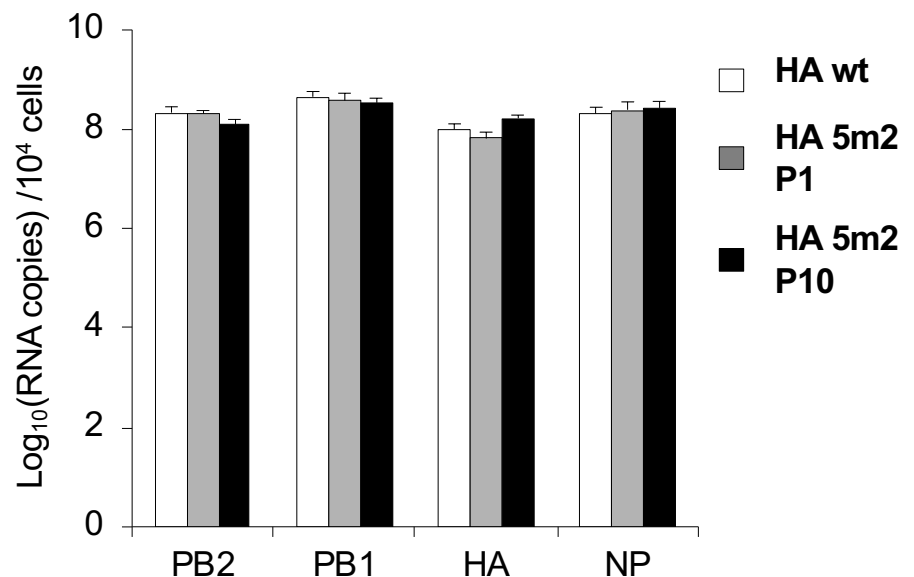

**Fig 2. Analysis of HA 5m2 viral replication.** (A) The HA 5m2 virus was passaged in MDCK cells at an MOI of  $10^{-5}$ . For each passage, supernatants were collected at 48 hours post-infection, and viral yields were determined by a plaque assay on MDCK cells. (B) 293T cells were transfected with plasmids to produce the mutant HA5m2 and wild-type viruses. After infecting MDCK cells at an MOI of  $10^{-5}$ , viral yields were determined at 48 hours post-infection. The data represent the mean  $\pm$  SD ( $n = 3$ ). (C) The purified viruses were analyzed via western blot using an anti-influenza A virus polyclonal antibody against HA, NP, and M1. (D) MDCK cells were infected with the viruses at an MOI of 1. Total RNA was extracted at 7 hours post-infection. PB2, PB1, HA, and NP vRNAs were analyzed using RT-qPCR analysis. Data represent the mean  $\pm$ SD of two independent experiments, each performed in triplicate.

A.

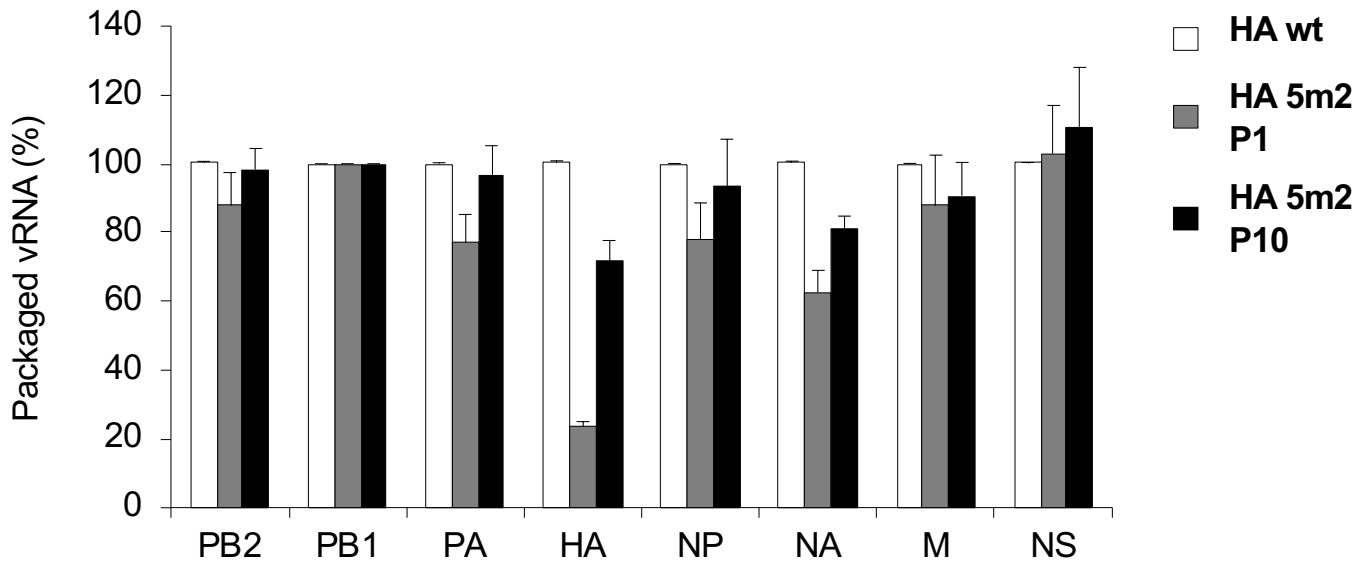

B.

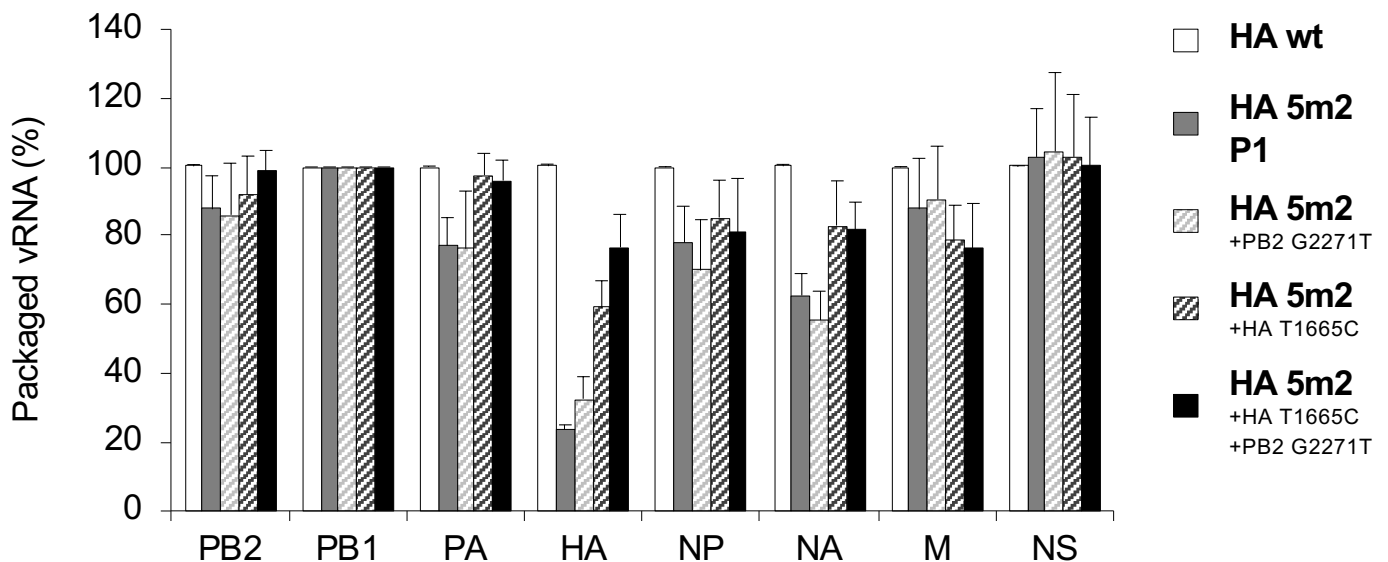

**Fig 3. Packaging of individual vRNA segments into progeny viral particles.** The amount of vRNA extracted from purified virus particles was quantified by RT-qPCR. All vRNAs were normalized to the amount of PB1 vRNA and to the average of that contained in the wild-type virus. Data represent the mean  $\pm$ SD from two independent experiments each conducted in triplicate. (A) The panel shows the relative amounts of eight vRNA from the wild-type virus, HA 5m2 P10 virus, and HA 5m2 P1 virus. (B) The panel shows the relative amounts of eight vRNA from the wild-type virus and mutant HA 5m2 viruses.

A.

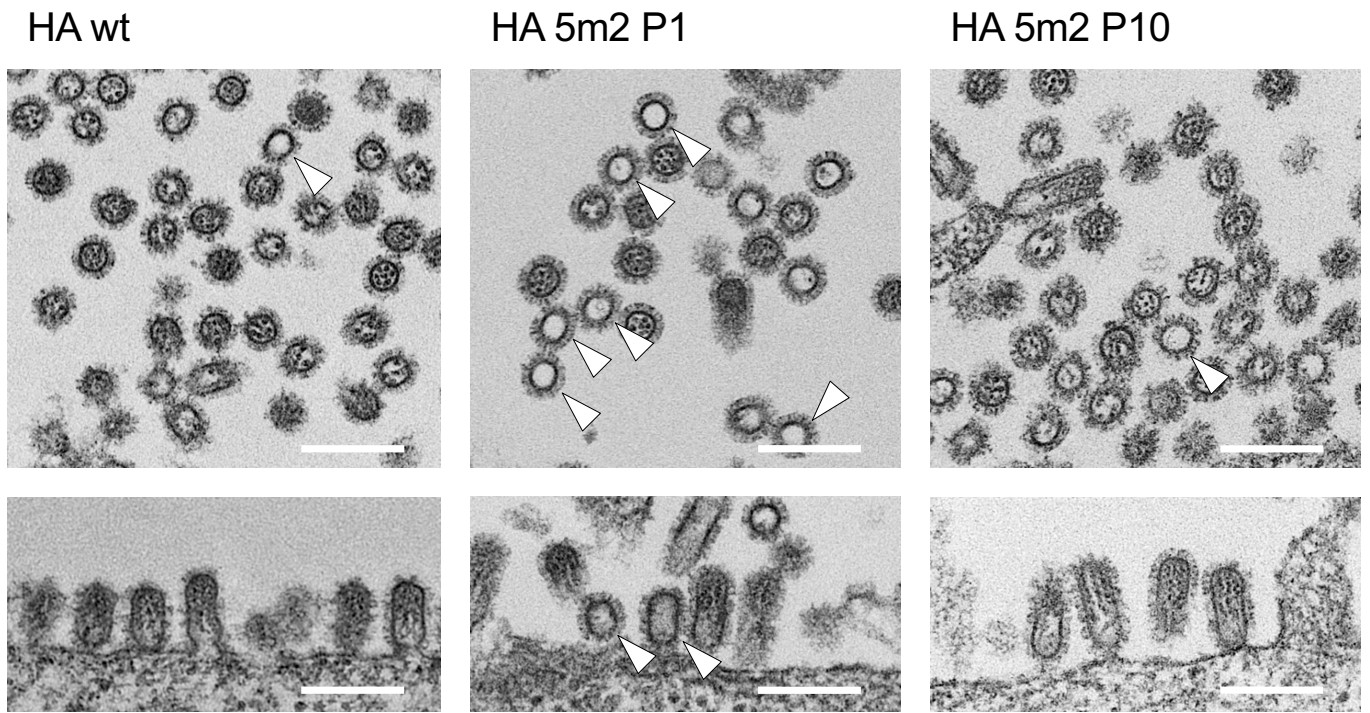

B.

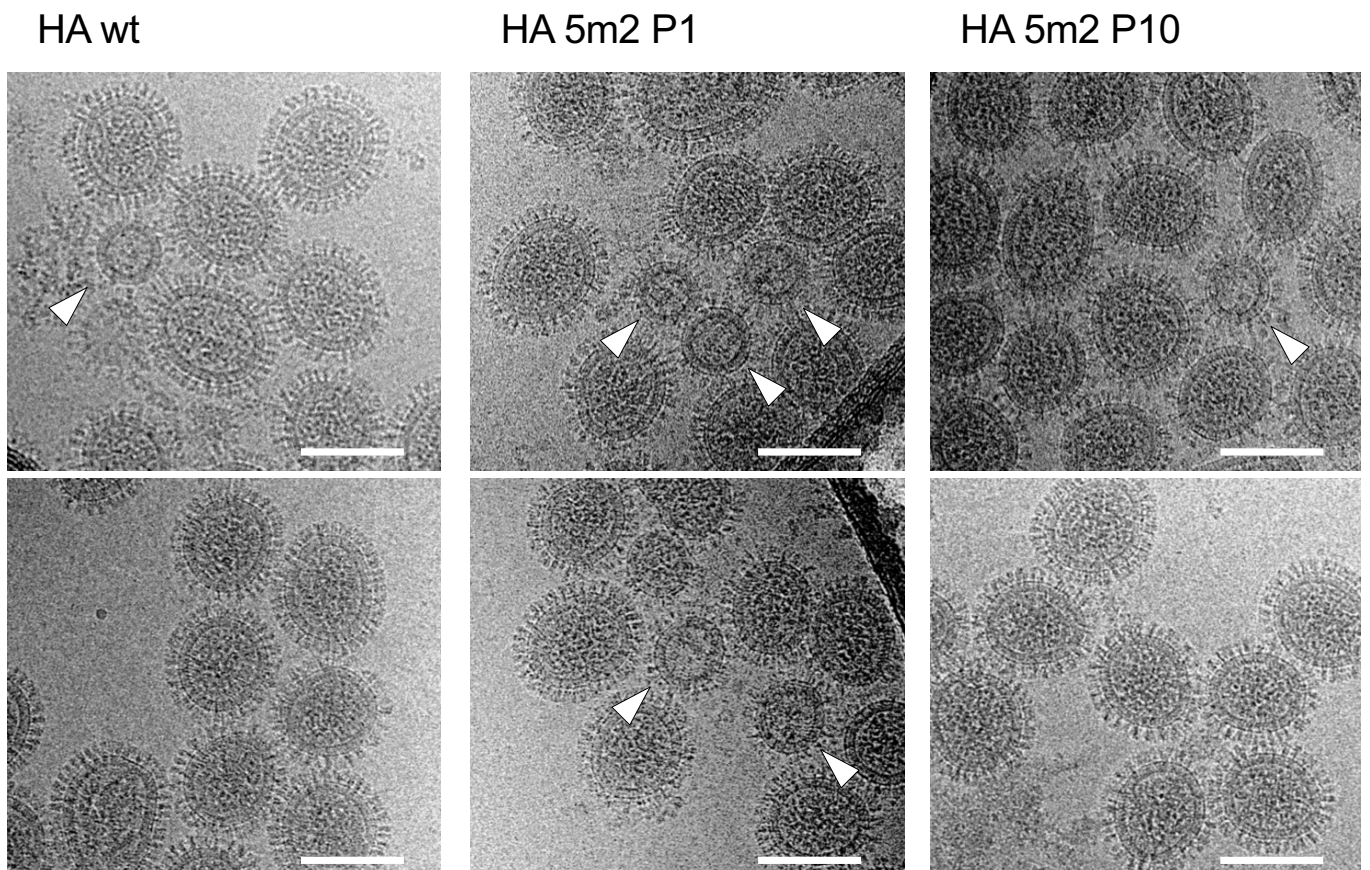

**Fig 4. Morphology of HA 5m2 P1, HA5m2 P10, and wild-type viruses.** (A) Ultrathin sections of viral particles budding from infected MDCK cells were observed using transverse section (upper side) and longitudinal section (lower side). Empty particles are indicated by arrowheads. Bars, 200 nm. (B) Purified virus particles were observed by cryo-TEM. Empty particles are indicated by arrowheads. Bars, 100 nm.

A.

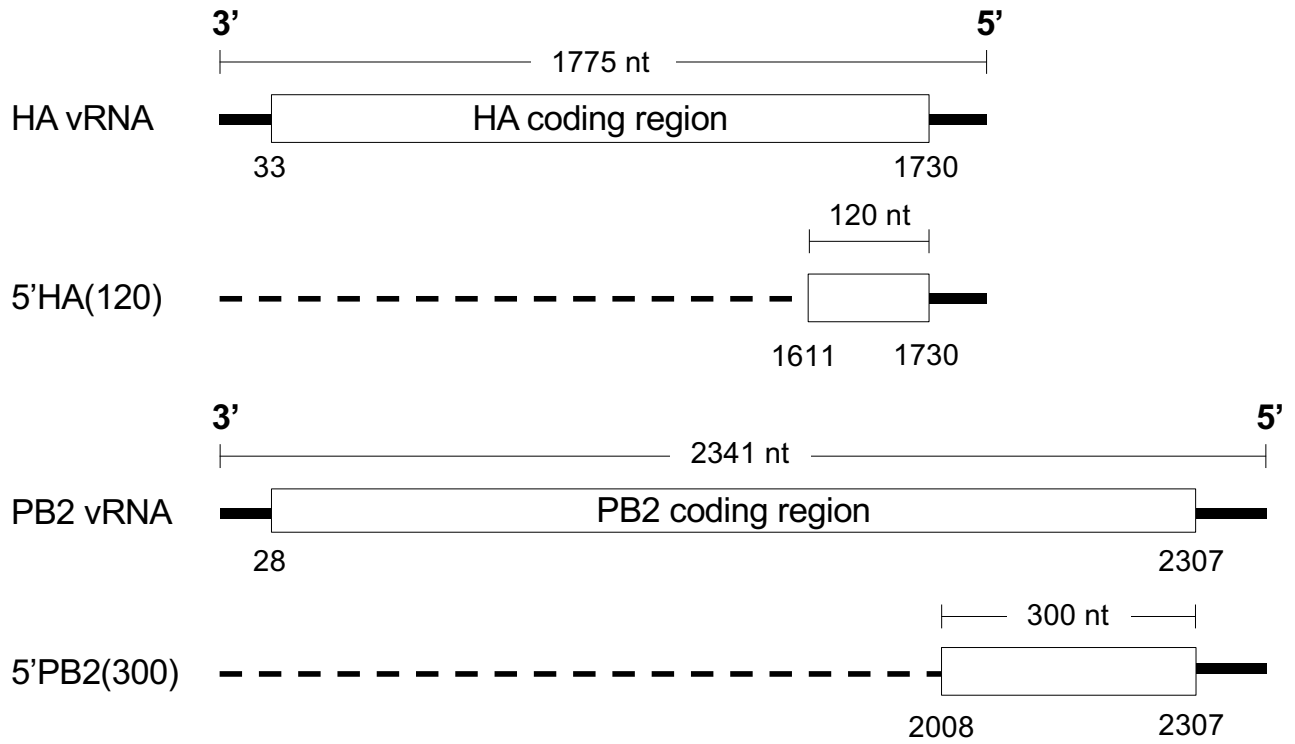

B.

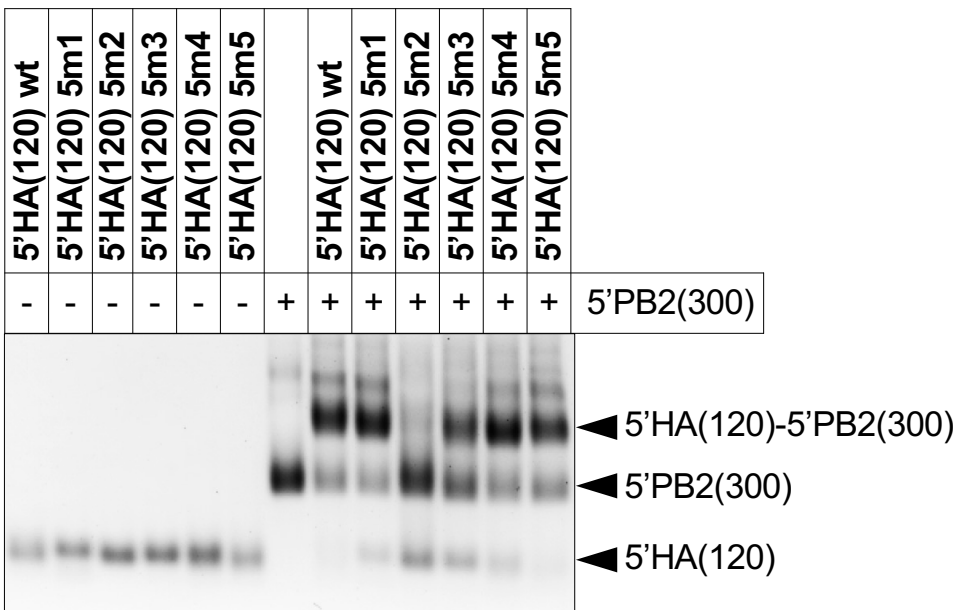

C.

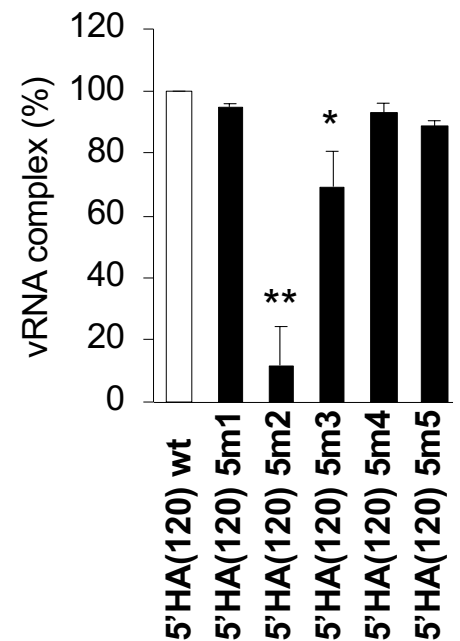

**Fig 5. Gel shift assay using 5' end sequences of HA and PB2 vRNAs.** (A) Schematic representation of 5'HA(120) and 5'PB2(300) vRNAs. The solid line represents the noncoding regions of vRNAs at the 3' and 5' ends. The white box represents the coding regions of the HA or PB2 proteins. The dashed line represents the deleted regions. 5'HA(120) and 5'PB2(300) contain 120 or 300 nucleotides in the coding and noncoding regions at their 5' ends, respectively. (B) The effect of silent mutations in 5'HA(120) vRNA on binding to 5'PB2(300) vRNA. 5'PB2(300) vRNA was incubated with wild-type and mutated 5'HA(120) vRNAs as indicated at the top of the gel image. Individual vRNA bands and vRNA complexes are indicated on the right. (C) Quantification of 5'HA(120)-5'PB2(300) complexes for each lane. The relative band intensity of the complex is indicated in comparison to that of the wild-type. The data represent the mean  $\pm$  SD (n = 3). Dunnett's test; \*P < 0.01; \*\*P < 0.001.
